# Supplementary material for: Uncoupling gene expression noise along the central dogma using genome engineered human cell lines
Source: PubMed Central journal article supplement — Nucleic Acids Res. 2020 Aug 18;48(16):9406–13. doi: 10.1093/nar/gkaa668 (PMC7498316; doi:10.1093/nar/gkaa668), 2020-08-18
Supplement: gkaa668_supplemental_file.pdf [file gkaa668_supplemental_file.pdf]

# **Uncoupling gene expression noise along the central dogma using genome engineered human cell lines**

Tyler Quarton<sup>1,2\*</sup>, Taek Kang<sup>1,2\*</sup>, Vasileios Papakis<sup>2,3</sup>, Khai Nguyen<sup>2,3</sup>, Chance Nowak<sup>1,2,3</sup>, Yi Li<sup>1,2</sup>, Leonidas Bleris<sup>1,2,3</sup>

<sup>1</sup> Bioengineering Department, University of Texas at Dallas, Richardson, Texas, USA

<sup>2</sup> Center for Systems Biology, University of Texas at Dallas, Richardson, Texas, USA

<sup>3</sup> Department of Biological Sciences, University of Texas at Dallas, Richardson, Texas, USA

\*Authors contributed equally

Correspondence should be addressed to L.B. ([bleris@utdallas.edu](mailto:bleris@utdallas.edu))

## Supplementary Figures

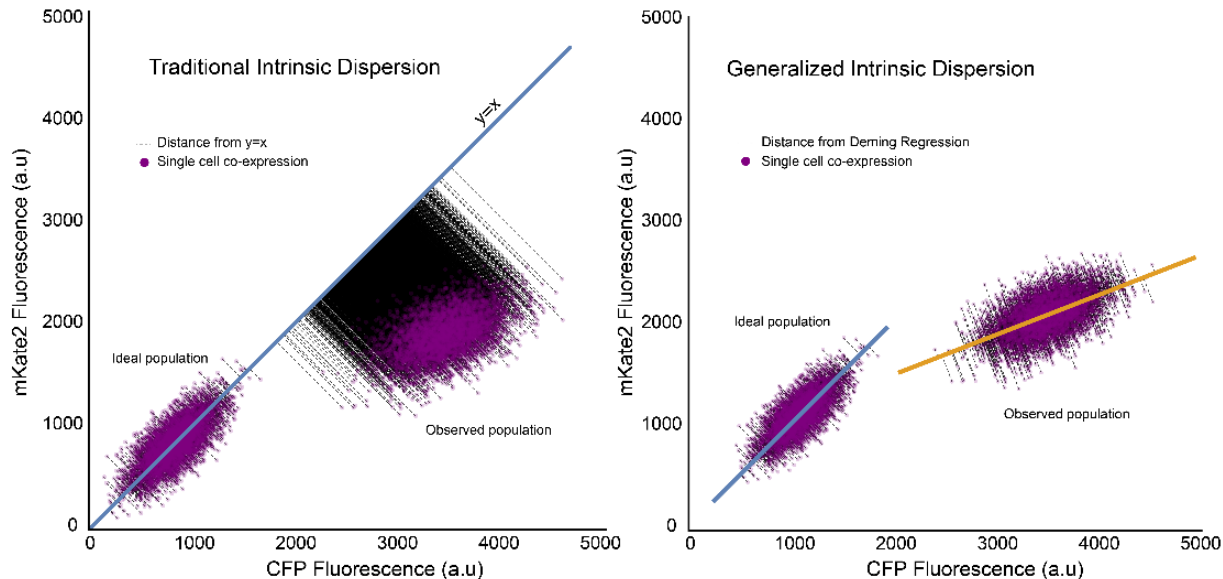

### Supplementary Figure 1. Requirements for decomposition of total noise in dual reporter systems.

Standard decomposition requires equal mean “Observed population”) “Ideal population” (left). In this study, we introduced a decomposition approach that can be applied generally whenever imbalances between reporter expression are present (right).

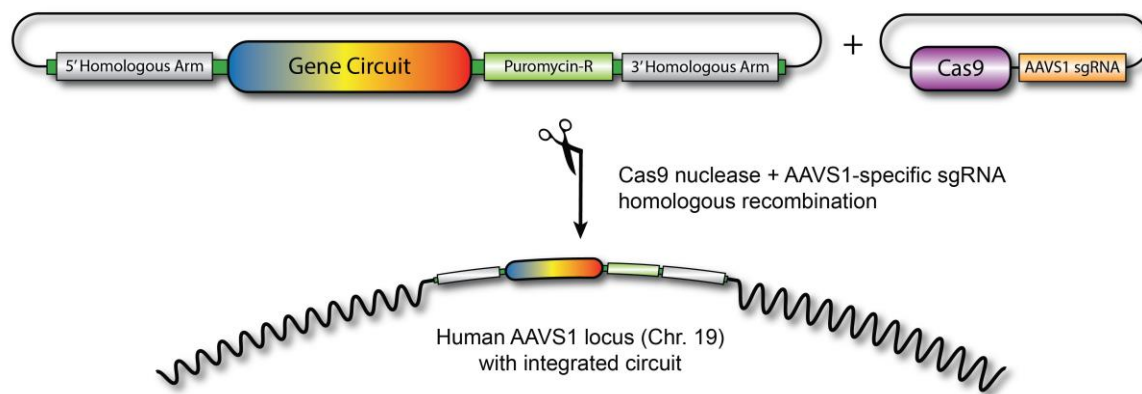

**Supplementary Figure 2.** Each circuit is stably integrated into the AAVS1 locus using Cas9-mediated homologous recombination.

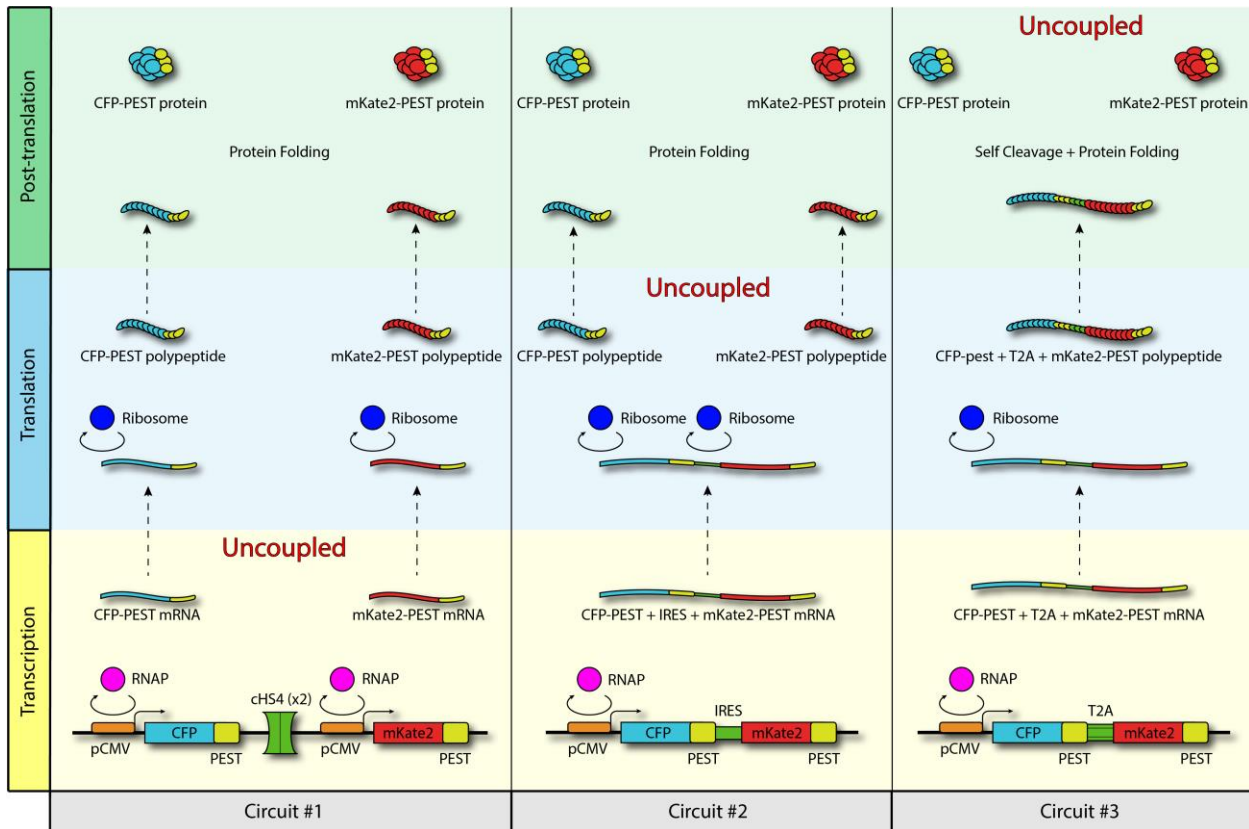

**Supplementary Figure 3: Serial uncoupling of noise analyzing circuits.** Each circuit uncouples the expression of their respective fluorescent proteins at different production stages. In the transcriptional stage (yellow), the CFP and mKate2 dependent production elements are uncoupled in circuit #1, as two individual genes produce two individual transcripts, and coupled in circuits #2 and #3 as single genes express transcripts that contains both the fluorescent protein's cistrons. In the translation stage (blue), the CFP and mKate2 dependent production persist to be uncoupled for circuit #1, becomes uncoupled for circuit #2, as the internal ribosome entry site allows for a single transcript to produce two polypeptides, and remains coupled for circuit #3. In the post-translational stage (green) circuits #1 and #2 maintain the uncoupled co-expression of CFP and mKate2 while circuit #3 becomes uncoupled through the autocatalytic activity of the T2A element which separates the single transcribed polypeptide into two proteins.

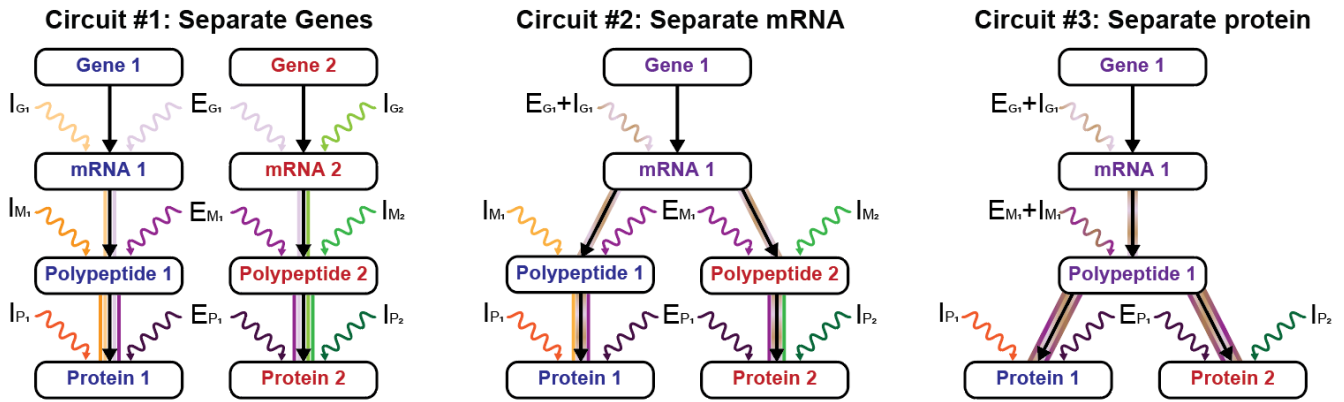

**Supplementary Figure 4. Graphical representation of the noise propagation in three circuits.** Each process in the central dogma steps is vulnerable to their respective intrinsic and extrinsic sources, and expression of the final gene product (Protein) consists of an accumulation of all preceding steps. If every step is uncoupled (Circuit 1), then the sources of the noise that make up the total noise of the final gene product can be traced back to its origin. Coupling of this process makes a single molecule vulnerable to intrinsic and extrinsic noise simultaneously, making it indistinguishable.

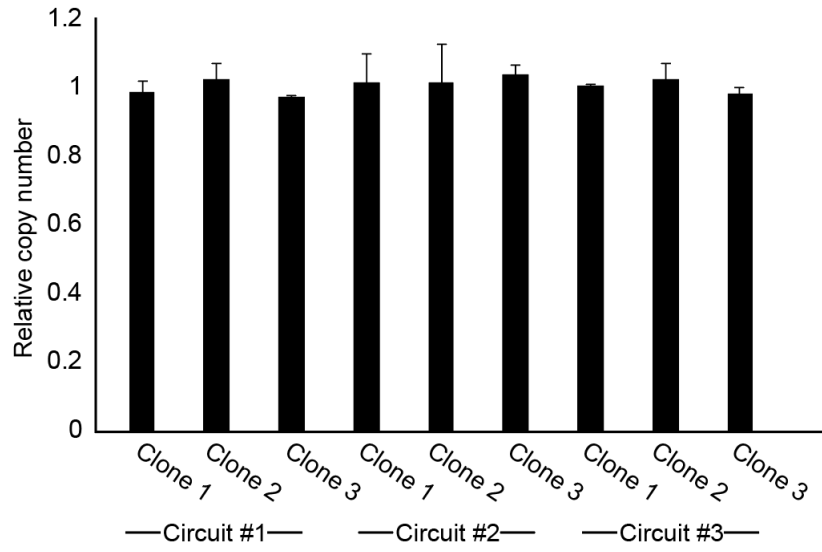

**Supplementary Figure 5. Relative copy number analysis of every monoclonal.**

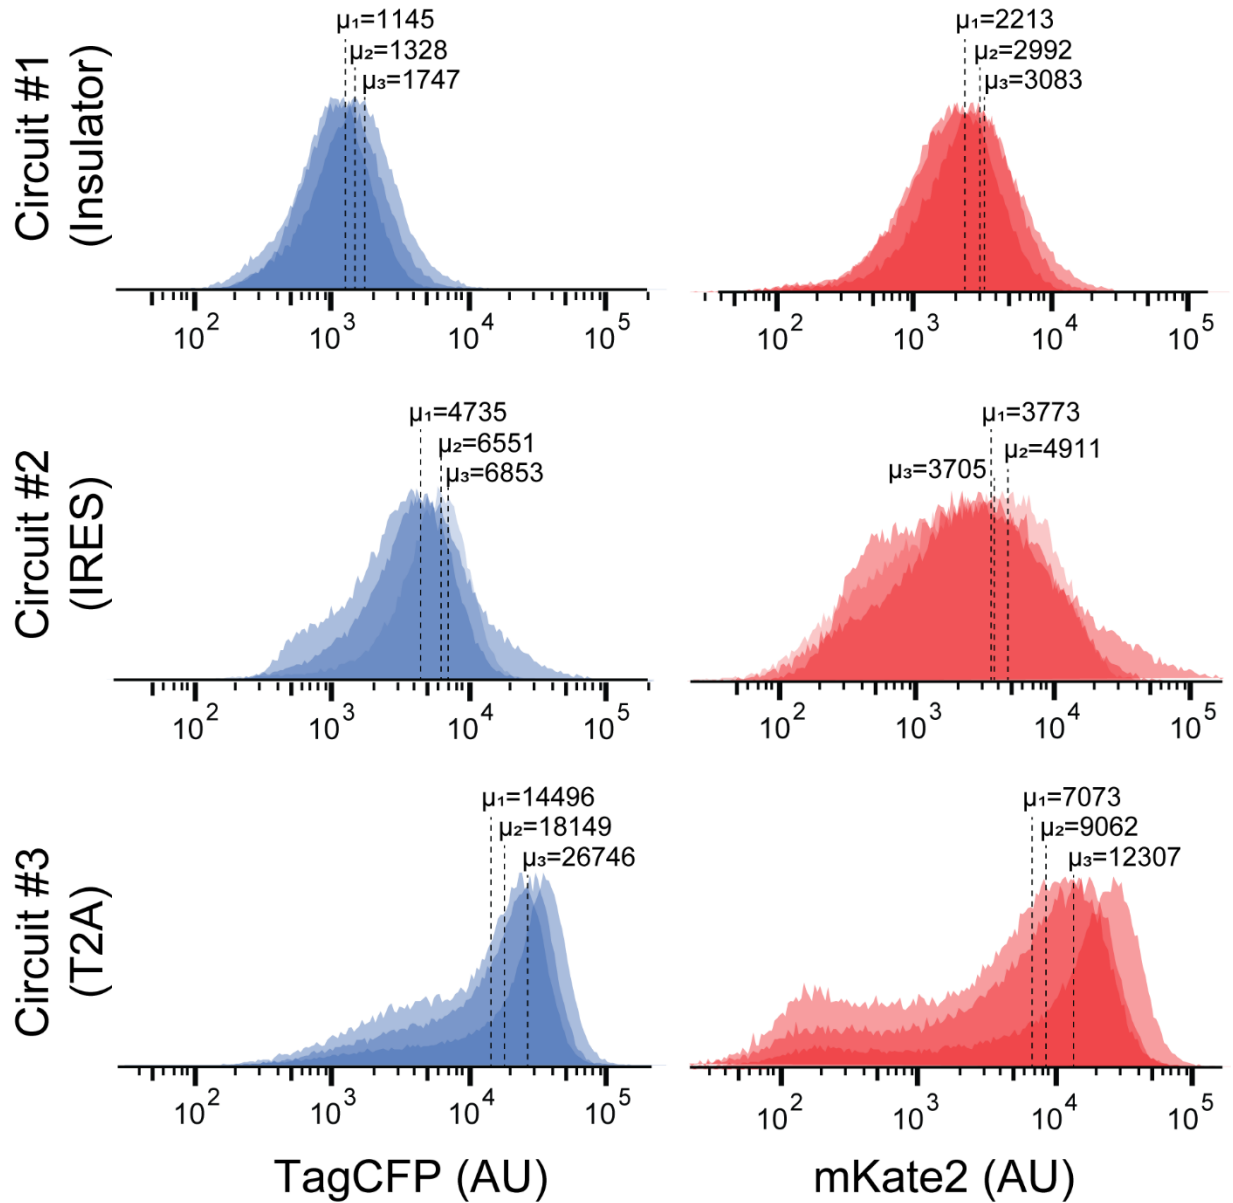

**Supplementary Figure 6. Histograms and mean expression values of TagCFP (left) and mKate2 (right) of the monoclonal population.**

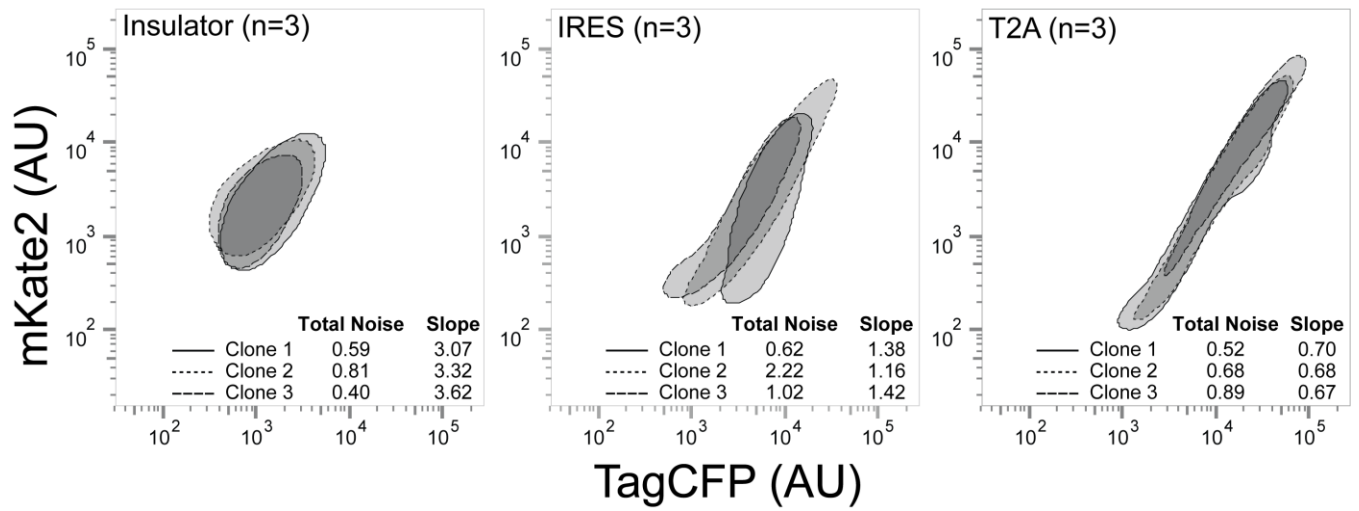

**Supplementary Figure 7. Total noise and slope of flow cytometry clouds for each monoclonal population.**



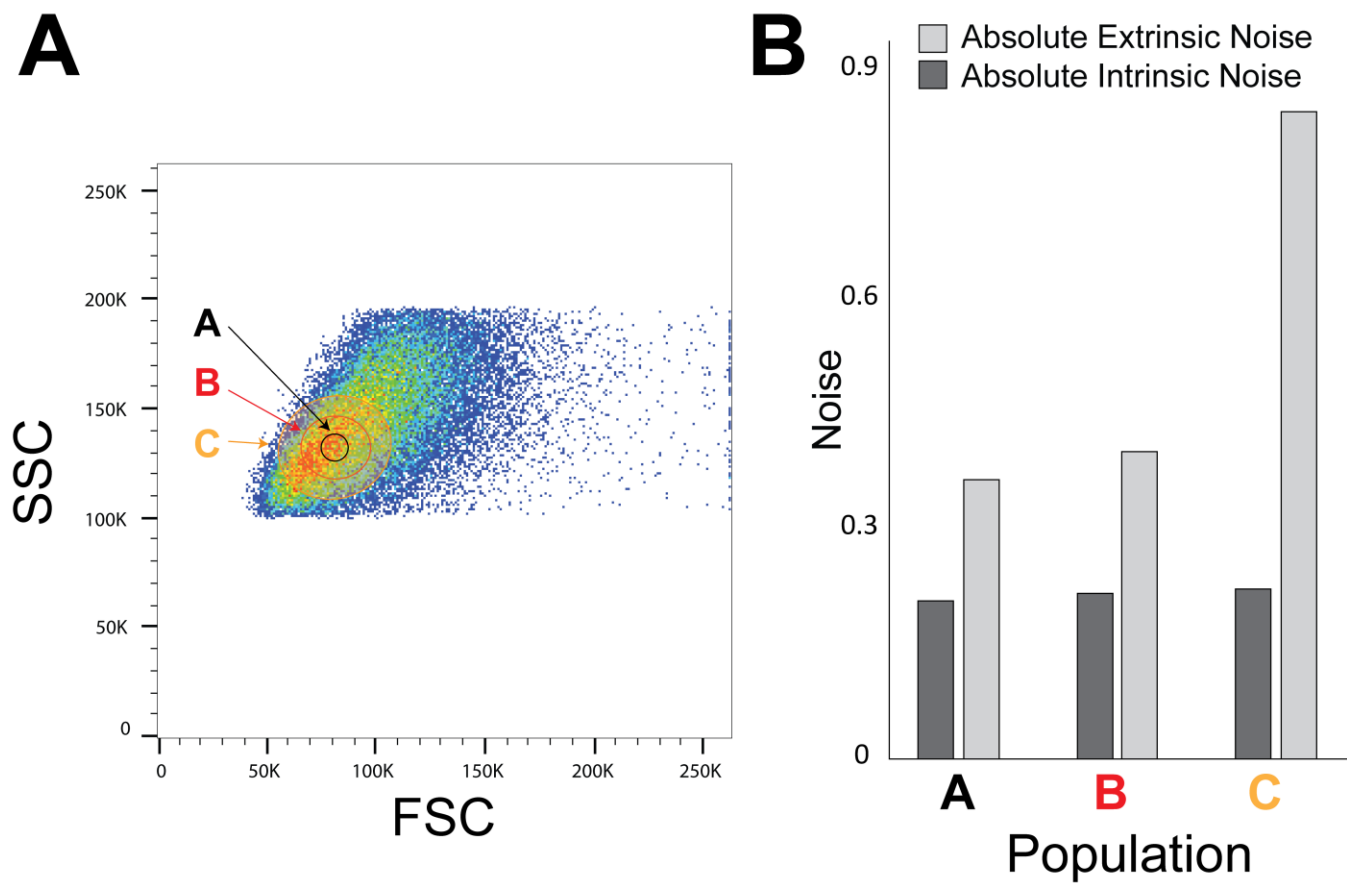

Supplementary Figure 8. Effect of FSC-SSC gate size on decomposed noise.

**Circuit #1: Separate Genes**

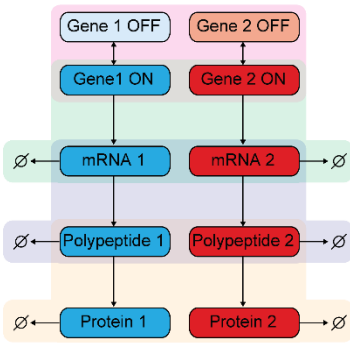

**Dizzy Code**

```

gene1_on, D1 -> A1, a;
gene2_on, D2 -> A2, a;
gene1_off, A1 -> D1, r;
gene2_off, A2 -> D2, r;
R1_synth, A1 -> R1 + A1, kR;
R2_synth, A2 -> R2 + A2, kR;
R1_deg, R1 ->, gR;
R2_deg, R2 ->, gR;
T1_synth, R1 -> T1 + R1, kT;
T2_synth, R2 -> T2 + R2, kT;
T1_deg, T1 ->, gT;
T2_deg, T2 ->, gT;
P1_synth, T1 -> P1 + T1, kP;
P2_synth, T2 -> P2 + T2, kP;
P1_deg, P1 ->, gP;
P2_deg, P2 ->, gP;
    
```

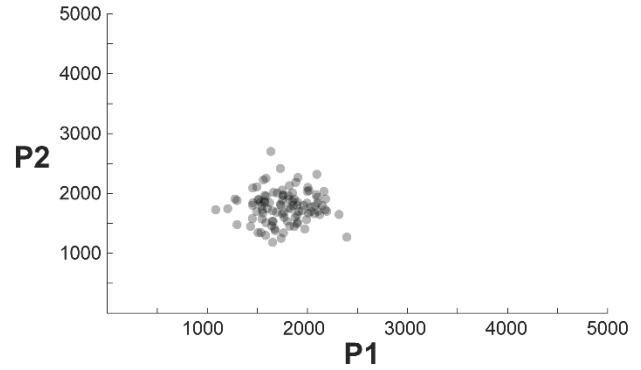

**Circuit #2: Separate mRNA**

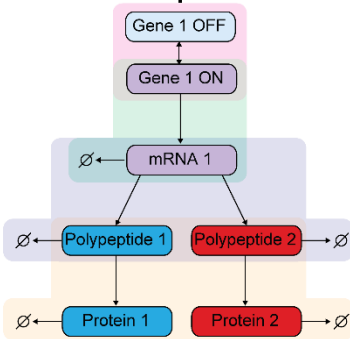

**Dizzy Code**

```

gene1_on, D1 -> A1, a;
gene1_off, A1 -> D1, r;
R1_synth, A1 -> R1 + A1, kR;
R1_deg, R1 ->, gR;
T1_synth, R1 -> T1 + R1, kT;
T2_synth, R1 -> T2 + R1, kT;
T1_deg, T1 ->, gT;
T2_deg, T2 ->, gT;
P1_synth, T1 -> P1 + T1, kP;
P2_synth, T2 -> P2 + T2, kP;
P1_deg, P1 ->, gP;
P2_deg, P2 ->, gP;
    
```

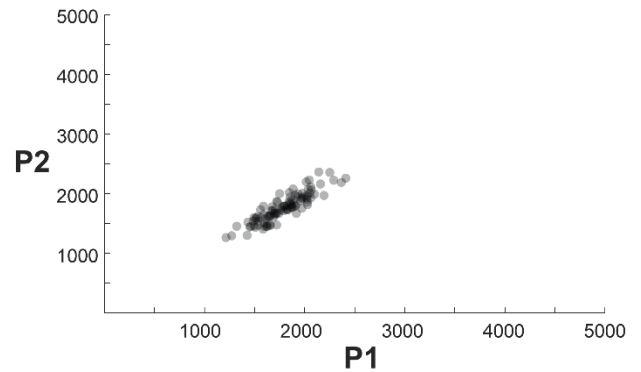

**Circuit #3: Separate protein**

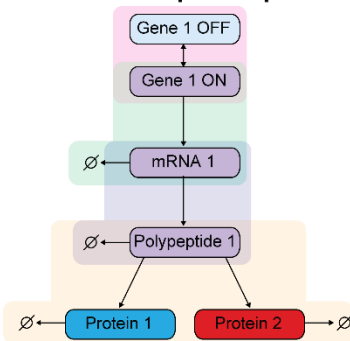

**Dizzy Code**

```

gene1_on, D1 -> A1, a;
gene1_off, A1 -> D1, r;
R1_synth, A1 -> R1 + A1, kR;
R1_deg, R1 ->, gR;
T1_synth, R1 -> T1 + R1, kT;
T1_deg, T1 ->, gT;
P1_synth, T1 -> P1 + T1, kP;
P2_synth, T1 -> P2 + T1, kP;
P1_deg, P1 ->, gP;
P2_deg, P2 ->, gP;
    
```

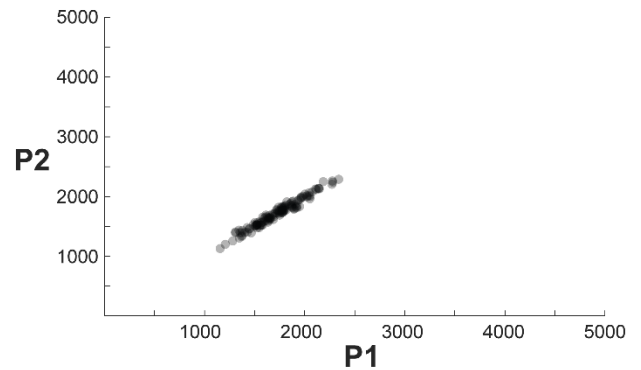

**Supplementary Figure 9. Stochastic simulations using Dizzy.** The chemical reactions of each circuit were modeled in Dizzy. In this model, the noise of each chemical process determined by the Gillespie stochastic algorithm, which represents intrinsic noise only. Each model was simulated 200 times, and the scatter plot of the results are shown in right.

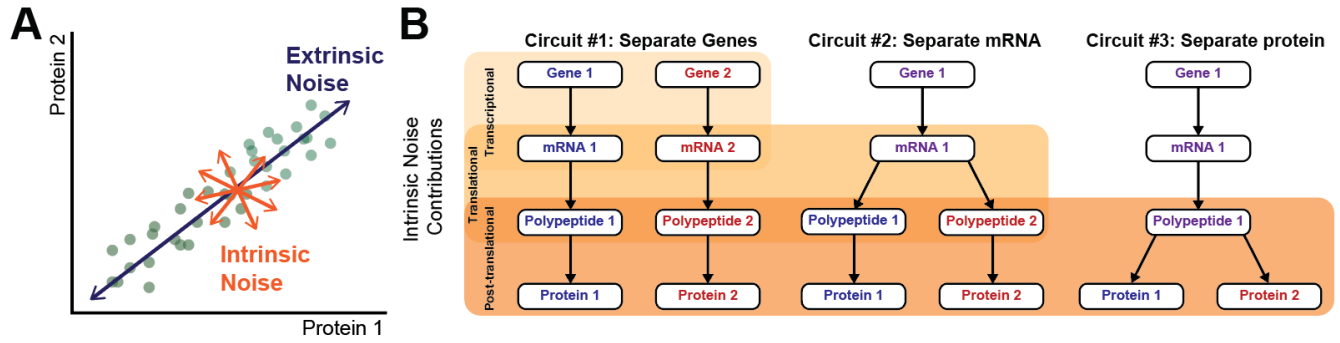

**Supplementary Figure 10. A graphical illustration of extrinsic and intrinsic noise spread in a dual fluorescent reporter system.** Intrinsic noise contributions that occur at each step in the central dogma process of the synthetic circuits.

## EIV Modeling of Extrinsic and Intrinsic Noise in Biological Systems

Consider two variables,  $X$  and  $Y$  representing two fluorescent proteins, respectively, that are assumed to be observed as

$$\begin{aligned}x_i &= \hat{X} + \delta_i + \theta_i \\y_i &= \hat{Y} + \varepsilon_i + \theta_i\end{aligned}$$

where  $\hat{X}$  and  $\hat{Y}$  represents the noiseless true mean of  $x_i$ , and  $y_i$  respectively, and  $\delta_i \sim \mathbf{N}(0, \sigma_\delta^2)$ ,  $\varepsilon_i \sim \mathbf{N}(0, \sigma_\varepsilon^2)$ , and  $\theta_i \sim \mathbf{N}(0, \sigma_\theta^2)$  are random noise components each sampled independently from their own respective independently distributed normal distributions. We assume that the error parameters are normally distributed such that  $E[\delta_i] = E[\varepsilon_i] = E[\theta_i] = 0$  and  $Var[\delta_i] = \sigma_\delta^2$ ,  $Var[\varepsilon_i] = \sigma_\varepsilon^2$  and  $Var[\theta_i] = \sigma_\theta^2$  for all  $i$ .

We interpret the variable specific noise sources,  $\delta_i$  and  $\varepsilon_i$ , to be intrinsic sources of noise as these error terms independently obfuscate the true observation of their respective protein. As such, we assume the terms  $\delta_i$  and  $\varepsilon_i$  are mutually uncorrelated. Thus,

$$\text{Cov}[\delta_i, \delta_j] = \text{Cov}[\varepsilon_i, \varepsilon_j] = 0, \quad i \neq j,$$

$$\text{Cov}[\delta_i, \varepsilon_j] = 0, \quad \forall i, j.$$

Furthermore, we interpret the noise source that affects both variables,  $\theta_i$ , to be an extrinsic source of noise that obfuscates the true observations of both proteins simultaneously while remaining independent of the intrinsic noise sources. Thus,

$$\text{Cov}[\theta_i, \theta_j] = 0, \quad i \neq j,$$

$$\text{Cov}[\theta_i, \varepsilon_j] = \text{Cov}[\theta_i, \delta_i] = 0 \quad \forall i, j.$$

## Derivation of Elowitz's models from our generalized model

The original model of extrinsic and intrinsic noises proposed by Elowitz could be derived from our generalized model when assuming the Demin regression takes the format as:

$$Y = m + k \cdot X$$

where  $k = 1$  and  $m = 0$ .

Here, the RMS is calculated as:

$$RMS = \sqrt{\frac{1}{n} \sum_{i=1}^n \text{dist}(\{x_i, y_i\}, y = x)^2}$$

which reduced to

$$RMS = \sqrt{\frac{1}{2n} \sum_{i=1}^n (x_i - y_i)^2}$$

or

$$RMS = \sqrt{\frac{\mu_{(x-y)^2}}{2}}$$

where  $\mu_{(x-y)^2}$  denotes the mean for  $(x - y)^2$ .

Finally, the intrinsic noise ( $\eta_{int}$ ) is calculated as:

$$\eta_{int}^2 = \frac{RMS^2}{\mu_X \cdot \mu_Y}$$

or

$$\eta_{int}^2 = \frac{\mu_{(x-y)^2}}{2 \cdot \mu_X \cdot \mu_Y}$$

which is identical to the original format proposed by Elowitz.

## Supplementary Methods

### Plasmid Construction and Integration

For the construction of VP1.1.2 (PCMV-CFP-PEST-T2A-mKate2-PEST), mKate2-PEST was PCR amplified using primers P1.1.1-F and P1.1.1-R and cloned into the AAVS1 donor plasmid (unpublished data) using Eco47III and EcoRV restriction enzyme sites. The reverse primer included an EcoRI restriction enzyme site. The 922bp amplicon and donor plasmid were digested with Eco47III and EcoRI restriction enzymes, then ligated and transformed to give the product VP1.1.1(PCMV-T2A-mKate2-PEST). Using VP1.1.3 (PCMV-CFP-PEST) as template, CFP-PEST was amplified using the forward primer: P1.1.2-F and reverse primer: P1.1.2-R. The forward primer contained a ClaI restriction enzyme site and the reverse an EcoRV restriction enzyme site. The amplicon and VP1.1.1 were digested using ClaI and EcoRV restriction enzymes, then ligated and transformed to give product VP1.1.2 (PCMV-CFP-PEST-T2A-mKate2-PEST).

For the construction of VP1.1.9 (PCMV-CFP-PEST-IRES-mKate2-PEST), CFP-Pest was amplified using CN1.100.6 and forward primer: P1.1.3-F and reverse primer: P1.1.3-R. The forward primer included a ClaI restriction enzyme site and the reverse primer single EcoRI, NsiI and NruI enzyme sites. The amplicon and donor plasmid were digested using ClaI and EcoRI restriction enzymes, then ligated and transformed to give product VP1.1.3 (PCMV-CFP-PEST). In order to remove an unwanted NruI restriction enzyme site upstream of the PCMV promoter, a short region upstream of the promoter was amplified using forward primer: P1.1.4-F and reverse primer: P1.1.4-R. The amplicon and VP1.1.3 were digested with PmlI and ClaI restriction enzymes, then ligated and transformed, giving product VP1.1.4. The IRES sequence was amplified using IRES plasmid (unpublished data) as template and forward primer: P1.1.5-F and reverse primer: P1.1.5-R. The forward primer contained a NruI restriction enzyme site and the reverse primer contained single NsiI and EcoRV restriction enzyme sites. The amplicon and VP1.1.4 were digested using NsiI and NruI, then ligated and transform to give product VP1.1.6. Using B19 (unpublished data) as template, mKate2-PEST was amplified using forward primer: P1.1.6-F and reverse primer: P1.1.6-R. The forward primer contained an EcoRV restriction enzyme site and the reverse primer contained a NsiI restriction enzyme site. The amplicon and VP1.1.6 were digested using EcoRV and NsiI, then ligated and transform to give product VP1.1.9.

For the construction of VP1.1.12 (PCMV-CFP-PEST-PCMV-mKate2-PEST), mKate2-PEST was amplified using Ubc-mKate-PEST (unpublished data) as template with forward primer: P1.1.7-F and

reverse primer: P1.1.7-R. The forward primer contained an Eco47III restriction enzyme site and the reverse primer contained an EcoRI restriction enzyme site. The amplicon and donor plasmids were digested using EcoRI and Eco47III restriction enzymes, then ligated and transformed to give product VP1.1.10 (PCMV-mKate2-PEST). Using VP1.1.10 as template and forward primer: P1.1.8-F and reverse primer: P1.1.8-R, PCMV-mKate2-PEST was amplified. The forward primer contained single NruI and NsiI restriction enzyme sites. The amplicon and VP1.1.9 were digested with NruI and EcoRI restriction enzymes, then ligated and transformed to give product VP1.1.11. VP1.1.11 and K7.35.15 (unpublished data) were digested using NsiI restriction enzyme, then ligated and transformed to give product VP1.1.12 (PCMV-CFP-PEST-PCMV-mKate2-PEST).

### **Relative transgene copy number**

Real-time quantitative PCR (KAPA SYBR FAST qPCR Master Mix Kit, Sigma-Aldrich) has been used as an alternative to Southern blot or fluorescence in situ hybridization for detection of gene copy numbers<sup>1</sup>. The  $\Delta C_t$  values for each sample were first determined as:  $2^{-\Delta C_t} = 2^{-C_t, \text{mKate2}} / 2^{-C_t, \text{BRCA1}}$ , where BRCA1 was used as the reference gene. The relative copy numbers of mKate2 of all stable clones were normalized by using the value of Circuit #3 clone1 as the normalization control. The PCR primers (final concentration 200 nM) are: mKate2 forward primer: 5'- caaaccttcatcaaccacac-3'; mKate2 reverse primer: 5'- ttaccctctgatcttgac-3'; BRCA1 forward primer: 5'- gagcgtcccctcacaataa-3'; and BRCA1 reverse primer: 5'- tgctccgttggttagttcc-3'. The PCR conditions were as follows: 95 °C for 3 minutes, followed by 40 cycles of 95 °C for 15 seconds and 60 °C for 30 seconds. All genomic DNA samples were extracted using DNeasy Blood and Tissue kit (Qiagen). Three independent DNA samples were obtained for each stable clone, and 50 ng of this harvested genomic DNA was used for PCR. The average copy numbers were calculated as the mean  $\pm$  SD. For statistical analysis, p-values were calculated using two-tailed t-tests, and p-values larger than 0.05 were determined as no statistical difference.

| <b>Primer Table</b> |                                                                                                                          |
|---------------------|--------------------------------------------------------------------------------------------------------------------------|
| P1.1.1-F            | CAGTACAGCGCTGATATCGAGGGCAGAGGAAGTCTTCTAACATGCGGTGACG<br>TGGAGGAGAATCCCGGCCCTATGGTGAGCGAGCTGATTAAGGAGA                    |
| P1.1.1-R            | CAGTACGAATTCTTATCTAGAGACGTTGATCCTGGC                                                                                     |
| P1.1.2-F            | CAGTACATCGATTAGTTATTAATAGTAATCAATTAC                                                                                     |
| P1.1.2-R            | CAGTACGATATCGACGTTGATCCTGGCGCTGGCGCA                                                                                     |
| P1.1.3-F            | CAGTACATCGATTAGTTATTAATAGTAATCAATTAC                                                                                     |
| P1.1.3-R            | CAGTACGAATTCATGCATCAGTACTCGCGATTAGACGTTGATCCTGGCGC                                                                       |
| P1.1.4-F            | CAGTACCACGTGATGTCCTCTGAGCGGATCCTCCCCG                                                                                    |
| P1.1.4-R            | CAGTACATCGATGGCCTGCAGGGCGAACCGGCCCTGGGAATATAAGGTGGTC<br>CCAG                                                             |
| P1.1.5-F            | CAGTACTCGCGAGGGGGCCCTCTCCCTCCCCCCCC                                                                                      |
| P1.1.5-R            | CAGTACATGCATCAGTACGATATCTGTGGCCATATTATCATCGTGTTT                                                                         |
| P1.1.6-F            | CAGTACGATATCATGGTGAGCGAGCTGATTAAGGAG                                                                                     |
| P1.1.6-R            | CAGTACATGCATTTATCTAGAGACGTTGATCCTGGC                                                                                     |
| P1.1.7-F            | CAGTACAGCGCTATGGTGAGCGAGCTGATTAAGGAG                                                                                     |
| P1.1.7-R            | CAGTACGAATTCTTATCTAGAGACGTTGATCCTGGC                                                                                     |
| P1.1.8-F            | CAGTACTCGCGAGTCGACAATGGTTACAAATAAAGCAATAGCATCACAAATT<br>TCACAAATAAAGCATTTCCTACTGCATGCATTAGTTATTAATAGTAATCAAT<br>TACGGGGT |
| P1.1.8-R            | GAATTCTTATCTAGAGACGTTGATCCCAGTAC                                                                                         |



| <b>Name</b> | <b>CFP Mean</b>        | <b>mKate2 Mean</b>     | <b>CFP Variance</b> | <b>mKate2 Variance</b>       | <b>CFP mKate Covariance</b>  | <b>Slope</b>                  |
|-------------|------------------------|------------------------|---------------------|------------------------------|------------------------------|-------------------------------|
| ins1_1      | 1327.521994            | 2992.390963            | 1320006.971         | 5272099.712                  | 1436682.296                  | 3.075926717                   |
| ins1_2      | 1340.537315            | 3054.377012            | 1576864.501         | 5615170.016                  | 1550403.534                  | 2.944303013                   |
| ins1_3      | 1322.179102            | 2969.645503            | 1349942.498         | 4840537.49                   | 1355370.74                   | 2.91807268                    |
| ins2_1      | 1747.614634            | 3083.711492            | 2077660.106         | 10861527.85                  | 2912511.328                  | 3.317284048                   |
| ins2_2      | 1771.798698            | 3126.151353            | 2360210.986         | 11635016.99                  | 3135647.505                  | 3.264229497                   |
| ins2_3      | 1796.388492            | 3158.423655            | 2559888.244         | 12202415.67                  | 3187889.695                  | 3.325424848                   |
| ins4_1      | 1144.63248             | 2213.437546            | 536962.2542         | 2634988.241                  | 627723.4258                  | 3.61853862                    |
| ins4_2      | 1130.760419            | 2206.412023            | 560051.1712         | 2728423.572                  | 655073.1111                  | 3.588680226                   |
| ins4_3      | 1142.388366            | 2212.262455            | 553445.9108         | 2754429.056                  | 634133.4467                  | 3.738344698                   |
| ires16_1    | 6780.203836            | 5149.915767            | 58654347.65         | 105109241.1                  | 70230671.86                  | 1.384012077                   |
| ires16_2    | 6551.885381            | 4911.770556            | 54639951.01         | 93955669.68                  | 63446316.88                  | 1.35673836                    |
| ires16_3    | 6651.635863            | 4990.545234            | 56339525.22         | 94819510.53                  | 64240127.78                  | 1.343389703                   |
| ires1_1     | 6853.653526            | 3705.137909            | 14493098.72         | 18106611.66                  | 12013728.4                   | 1.161618884                   |
| ires1_2     | 7045.158791            | 4057.253781            | 15398331.57         | 20800964.58                  | 13279950.69                  | 1.223877037                   |
| ires1_3     | 6892.321574            | 3924.806576            | 14449077.48         | 18574080.23                  | 12278092.79                  | 1.181981296                   |
| ires3_1     | 4735.463941            | 3773.578413            | 13623577.74         | 24673884.11                  | 15502500.08                  | 1.418025505                   |
| t2a11_1     | 26746.63748            | 12307.54154            | 238665198.3         | 126103565                    | 157161948.7                  | 0.704066884                   |
| t2a11_2     | 27481.62857            | 13389.31228            | 249232057.8         | 139972252.6                  | 170864784.1                  | 0.730131366                   |
| t2a11_3     | 27613.3703             | 13473.29725            | 257007060.5         | 149389183.2                  | 178790814.8                  | 0.743334844                   |
| t2a1_1      | 18149.59557            | 9062.743357            | 157713015.9         | 76843765.65                  | 103025115.9                  | 0.681775776                   |
| t2a1_2      | 18019.1464             | 8954.53251             | 159432461.2         | 77686716.89                  | 103992974.3                  | 0.681422559                   |
| t2a1_3      | 17940.65109            | 8900.212446            | 154938118.3         | 74957336.85                  | 100755541.2                  | 0.67897074                    |
| t2a6_1      | 14496.51558            | 7073.532986            | 130681395.7         | 62939429.52                  | 83547401.02                  | 0.673634957                   |
| t2a6_2      | 14329.89215            | 6898.789204            | 129363873.4         | 60872385.54                  | 81566736.79                  | 0.664702946                   |
| t2a6_3      | 14116.39462            | 6828.972724            | 126894097.3         | 60323632.76                  | 80447954.12                  | 0.668456597                   |
| <b>Name</b> | <b>Extrinsic Noise</b> | <b>Intrinsic Noise</b> | <b>Total Noise</b>  | <b>Normalized Ext. Noise</b> | <b>Normalized Int. Noise</b> | <b>Normalized Total Noise</b> |
| ins1_1      | 0.361660169            | 0.214712398            | 0.576372567         | 0.627476375                  | 0.372523625                  | 1                             |
| ins1_2      | 0.378654567            | 0.256511915            | 0.635166482         | 0.596150109                  | 0.403849891                  | 1                             |
| ins1_3      | 0.345193976            | 0.225516265            | 0.570710241         | 0.604849801                  | 0.395150199                  | 1                             |
| ins2_1      | 0.540440903            | 0.222613995            | 0.763054898         | 0.70825953                   | 0.29174047                   | 1                             |

|          |             |             |             |             |             |   |
|----------|-------------|-------------|-------------|-------------|-------------|---|
| ins2_2   | 0.566112646 | 0.25268455  | 0.818797196 | 0.691395438 | 0.308604562 | 1 |
| ins2_3   | 0.561865852 | 0.282221102 | 0.844086954 | 0.665649255 | 0.334350745 | 1 |
| ins4_1   | 0.247762171 | 0.143470193 | 0.391232364 | 0.633286492 | 0.366713508 | 1 |
| ins4_2   | 0.262562416 | 0.151314066 | 0.413876482 | 0.634398009 | 0.365601991 | 1 |
| ins4_3   | 0.250917088 | 0.151870489 | 0.402787577 | 0.622951408 | 0.377048592 | 1 |
| ires16_1 | 2.011332851 | 0.2265273   | 2.237860151 | 0.898775042 | 0.101224958 | 1 |
| ires16_2 | 1.971523932 | 0.244735703 | 2.216259636 | 0.889572639 | 0.110427361 | 1 |
| ires16_3 | 1.935218172 | 0.256664629 | 2.191882801 | 0.882902212 | 0.117097788 | 1 |
| ires1_1  | 0.47309819  | 0.163466582 | 0.636564771 | 0.743205108 | 0.256794892 | 1 |
| ires1_2  | 0.464593899 | 0.159100926 | 0.623694825 | 0.74490581  | 0.25509419  | 1 |
| ires1_3  | 0.453886348 | 0.150140662 | 0.60402701  | 0.751433861 | 0.248566139 | 1 |
| ires3_1  | 0.867532652 | 0.15059411  | 1.018126762 | 0.852087072 | 0.147912928 | 1 |
| t2a11_1  | 0.47742692  | 0.046931127 | 0.524358047 | 0.910497937 | 0.089502063 | 1 |
| t2a11_2  | 0.464356817 | 0.041353763 | 0.50571058  | 0.918226423 | 0.081773577 | 1 |
| t2a11_3  | 0.480564732 | 0.044311051 | 0.524875783 | 0.915578024 | 0.084421976 | 1 |
| t2a1_1   | 0.626349129 | 0.04014094  | 0.666490069 | 0.939772636 | 0.060227364 | 1 |
| t2a1_2   | 0.644505857 | 0.042284355 | 0.686790212 | 0.938431919 | 0.061568081 | 1 |
| t2a1_3   | 0.631001464 | 0.040996314 | 0.671997777 | 0.938993379 | 0.061006621 | 1 |
| t2a6_1   | 0.81476607  | 0.064932234 | 0.879698304 | 0.926188065 | 0.073811935 | 1 |
| t2a6_2   | 0.825082339 | 0.067307973 | 0.892390312 | 0.924575635 | 0.075424365 | 1 |
| t2a6_3   | 0.834518244 | 0.067913909 | 0.902432153 | 0.924743474 | 0.075256526 | 1 |

**Supplementary Table 1. Noise Decomposition from Engineered Cell Line.** We assume intrinsic noise as the normalized root mean square (RMS) distance from the orthogonal regression line of the two co-expressed reporter proteins. Specific to the reporter proteins used in our constructs, our intrinsic noise quantifies the dispersion of the co-expression of mKate2 and CFP as the RMS distance to an orthogonally regressed line rather than the co-expression line of equality  $mKate2 = CFP$ . To enable comparison across different cell lines, the extrinsic and intrinsic noises are normalized to the total noise of 1. For detailed calculation method, see **Generalized noise decomposition** section of the manuscript.

| Name                   | CFP Mean    | mKate2 Mean | CFP Variance | mKate2 Variance | CFP mKate Covariance | Slope       |
|------------------------|-------------|-------------|--------------|-----------------|----------------------|-------------|
| <b>Insulator_sim1</b>  | 7230.337226 | 7005.560575 | 33961762.41  | 32316337.51     | 25799717.37          | 0.968567913 |
| <b>Insulator_sim2</b>  | 7218.431279 | 7289.006603 | 33446462.79  | 33937213.16     | 25665643.94          | 1.009584757 |
| <b>Insulator_sim3</b>  | 7199.445077 | 7183.007337 | 33290868.62  | 32074560.22     | 24832053.33          | 0.975756152 |
| <b>Insulator_sim4</b>  | 7650.031911 | 7490.094371 | 35362748.81  | 34784036.06     | 26655645.93          | 0.989163715 |
| <b>Insulator_sim5</b>  | 7345.106278 | 7348.152977 | 36245806.15  | 36030804.88     | 28303200.66          | 0.996189306 |
| <b>Insulator_sim6</b>  | 7237.984645 | 7381.060393 | 33805989.05  | 34532496.02     | 25892631.53          | 1.014128924 |
| <b>Insulator_sim7</b>  | 7181.086983 | 7274.303562 | 30276006.06  | 34914301.72     | 24388736.7           | 1.099695104 |
| <b>Insulator_sim8</b>  | 7676.384396 | 7848.637461 | 37732144.03  | 38488003.86     | 28957779.66          | 1.013120332 |
| <b>Insulator_sim9</b>  | 7441.496125 | 7286.290831 | 32660645.18  | 33230812.43     | 24334805.71          | 1.011773606 |
| <b>Insulator_sim10</b> | 7393.687344 | 7371.732088 | 33949656.96  | 37464500.1      | 27404802.86          | 1.066227513 |
| <b>IRES_sim1</b>       | 7281.697153 | 7068.209898 | 31261520.73  | 29539529.87     | 25061495.07          | 0.96618544  |
| <b>IRES_sim2</b>       | 7289.307604 | 7212.823646 | 32432217.6   | 30865528.64     | 25706303.71          | 0.969939212 |
| <b>IRES_sim3</b>       | 7379.650448 | 7500.122558 | 32778717.48  | 35570059.35     | 28363385.71          | 1.050457037 |
| <b>IRES_sim4</b>       | 7256.313857 | 7328.587163 | 32653205.01  | 34732658.11     | 28553753             | 1.037107333 |
| <b>IRES_sim5</b>       | 7322.026644 | 7311.058536 | 34629883.67  | 33588669.19     | 28889737.75          | 0.982116134 |
| <b>IRES_sim6</b>       | 7344.833312 | 7508.955598 | 32509916.85  | 34255798.59     | 27951660.3           | 1.031740603 |
| <b>IRES_sim7</b>       | 7096.174338 | 7318.428167 | 33214428.28  | 33809810.97     | 28206479             | 1.010611965 |
| <b>IRES_sim8</b>       | 6781.008868 | 6836.386435 | 27908214.23  | 28465184.66     | 23173328.8           | 1.012085837 |
| <b>IRES_sim9</b>       | 7155.14384  | 7023.628051 | 33395756.2   | 28340995.47     | 25113025.41          | 0.904299689 |
| <b>IRES_sim10</b>      | 7141.285809 | 7037.226198 | 31495017.41  | 30980649.88     | 26269257.64          | 0.990238905 |
| <b>T2A_sim1</b>        | 6932.728522 | 7004.17378  | 32008216.26  | 32573800.54     | 29749684.72          | 1.009555335 |
| <b>T2A_sim2</b>        | 7177.263763 | 7241.850179 | 32865775.24  | 34609641.49     | 31007523.44          | 1.028539478 |
| <b>T2A_sim3</b>        | 7429.919319 | 7542.028283 | 32979024.09  | 34354056.21     | 31123866.46          | 1.02235297  |
| <b>T2A_sim4</b>        | 7137.481818 | 7227.977947 | 29819966.74  | 31431133.24     | 28126932.96          | 1.029076186 |
| <b>T2A_sim5</b>        | 6842.927506 | 6875.693756 | 31521783.35  | 31973188.53     | 29083274.78          | 1.007791935 |
| <b>T2A_sim6</b>        | 7220.785366 | 7286.601885 | 30162932.56  | 31739418.53     | 28354599.23          | 1.028208582 |
| <b>T2A_sim7</b>        | 7506.883458 | 7473.53568  | 39528899.41  | 38475193.19     | 36208643.66          | 0.985537059 |
| <b>T2A_sim8</b>        | 7094.360413 | 7048.682602 | 31888481.01  | 30630836.15     | 28393945             | 0.978073696 |
| <b>T2A_sim9</b>        | 7370.640112 | 7399.753129 | 33864337.8   | 34569724.43     | 31701062.99          | 1.011195034 |
| <b>T2A_sim10</b>       | 6997.391338 | 7015.004912 | 26548777.72  | 27775833.76     | 24592941.62          | 1.025281702 |

| <b>Name</b>            | <b>Extrinsic Noise</b> | <b>Intrinsic Noise</b> | <b>Total Noise</b> | <b>Normalized Ext. Noise</b> | <b>Normalized Int. Noise</b> | <b>Normalized Total Noise</b> |
|------------------------|------------------------|------------------------|--------------------|------------------------------|------------------------------|-------------------------------|
| <b>Insulator_sim1</b>  | 0.509346707            | 0.144636671            | 0.653983378        | 0.778837389                  | 0.221162611                  | 1                             |
| <b>Insulator_sim2</b>  | 0.487799101            | 0.152522886            | 0.640321986        | 0.761802829                  | 0.238197171                  | 1                             |
| <b>Insulator_sim3</b>  | 0.480183574            | 0.151666197            | 0.631849771        | 0.759964783                  | 0.240035217                  | 1                             |
| <b>Insulator_sim4</b>  | 0.465198895            | 0.146880545            | 0.61207944         | 0.760030259                  | 0.239969741                  | 1                             |
| <b>Insulator_sim5</b>  | 0.524395888            | 0.145163431            | 0.669559319        | 0.783195563                  | 0.216804437                  | 1                             |
| <b>Insulator_sim6</b>  | 0.484662898            | 0.154875389            | 0.639538287        | 0.757832499                  | 0.242167501                  | 1                             |
| <b>Insulator_sim7</b>  | 0.466882609            | 0.154992389            | 0.621874998        | 0.750766007                  | 0.249233993                  | 1                             |
| <b>Insulator_sim8</b>  | 0.480633764            | 0.15186649             | 0.632500255        | 0.759894973                  | 0.240105027                  | 1                             |
| <b>Insulator_sim9</b>  | 0.448808549            | 0.158781069            | 0.607589619        | 0.738670536                  | 0.261329464                  | 1                             |
| <b>Insulator_sim10</b> | 0.502800913            | 0.151290559            | 0.654091472        | 0.768701221                  | 0.231298779                  | 1                             |
| <b>IRES_sim1</b>       | 0.486928198            | 0.103446538            | 0.590374736        | 0.824778176                  | 0.175221824                  | 1                             |
| <b>IRES_sim2</b>       | 0.488931528            | 0.112800166            | 0.601731694        | 0.81254076                   | 0.18745924                   | 1                             |
| <b>IRES_sim3</b>       | 0.512452858            | 0.104369729            | 0.616822587        | 0.830794574                  | 0.169205426                  | 1                             |
| <b>IRES_sim4</b>       | 0.536941389            | 0.096284256            | 0.633225645        | 0.847946373                  | 0.152053627                  | 1                             |
| <b>IRES_sim5</b>       | 0.539674669            | 0.097415959            | 0.637090628        | 0.847092462                  | 0.152907538                  | 1                             |
| <b>IRES_sim6</b>       | 0.506811113            | 0.098229746            | 0.605040859        | 0.837647748                  | 0.162352252                  | 1                             |
| <b>IRES_sim7</b>       | 0.543133744            | 0.102133246            | 0.64526699         | 0.8417194                    | 0.1582806                    | 1                             |
| <b>IRES_sim8</b>       | 0.49988201             | 0.108109515            | 0.607991526        | 0.822185819                  | 0.177814181                  | 1                             |
| <b>IRES_sim9</b>       | 0.499711291            | 0.111998512            | 0.611709804        | 0.816909077                  | 0.183090923                  | 1                             |
| <b>IRES_sim10</b>      | 0.522720911            | 0.098842554            | 0.621563465        | 0.840977536                  | 0.159022464                  | 1                             |
| <b>T2A_sim1</b>        | 0.612662446            | 0.052308122            | 0.664970568        | 0.921337689                  | 0.078662311                  | 1                             |
| <b>T2A_sim2</b>        | 0.596566192            | 0.052291307            | 0.6488575          | 0.919410183                  | 0.080589817                  | 1                             |
| <b>T2A_sim3</b>        | 0.555419712            | 0.045239688            | 0.6006594          | 0.924683292                  | 0.075316708                  | 1                             |
| <b>T2A_sim4</b>        | 0.545205897            | 0.048209037            | 0.593414933        | 0.918759987                  | 0.081240013                  | 1                             |
| <b>T2A_sim5</b>        | 0.618137146            | 0.056606642            | 0.674743788        | 0.916106464                  | 0.083893536                  | 1                             |
| <b>T2A_sim6</b>        | 0.538907261            | 0.04914231             | 0.588049571        | 0.916431688                  | 0.083568312                  | 1                             |
| <b>T2A_sim7</b>        | 0.645396299            | 0.049722328            | 0.695118628        | 0.928469291                  | 0.071530709                  | 1                             |
| <b>T2A_sim8</b>        | 0.567811957            | 0.057168288            | 0.624980245        | 0.908527848                  | 0.091472152                  | 1                             |
| <b>T2A_sim9</b>        | 0.581234504            | 0.046093949            | 0.627328453        | 0.926523421                  | 0.073476579                  | 1                             |
| <b>T2A_sim10</b>       | 0.501009933            | 0.052187468            | 0.553197401        | 0.905662124                  | 0.094337876                  | 1                             |

**Supplementary Table 2. Noise Decomposition Results from Simulated Datasets.** See Supplementary Table 1 for calculation method.
